# Supplementary material for: Development and Validation of a Predictive Model for Gastric Cancer Based on the Albumin-to-Neutrophil-to-Lymphocyte Ratio: A Retrospective Cohort Study
Source: Research Square preprint supplement (doi:10.21203/rs.3.rs-7845089/v1), 2025-10-30
Supplement: Supplementary file 1 [file 592128cc54b797513b482e84.docx]

**Clinical trial registration number:** ChiCTR1800020329

**The website of the registration center:** <https://www.chictr.org.cn/showproj.html?proj=31813>

**Figure S1. Kaplan-Meier curve of ANLR based on differentiation degree subgroup in GC patients ( High - Moderate and Low - undifferentiated )**


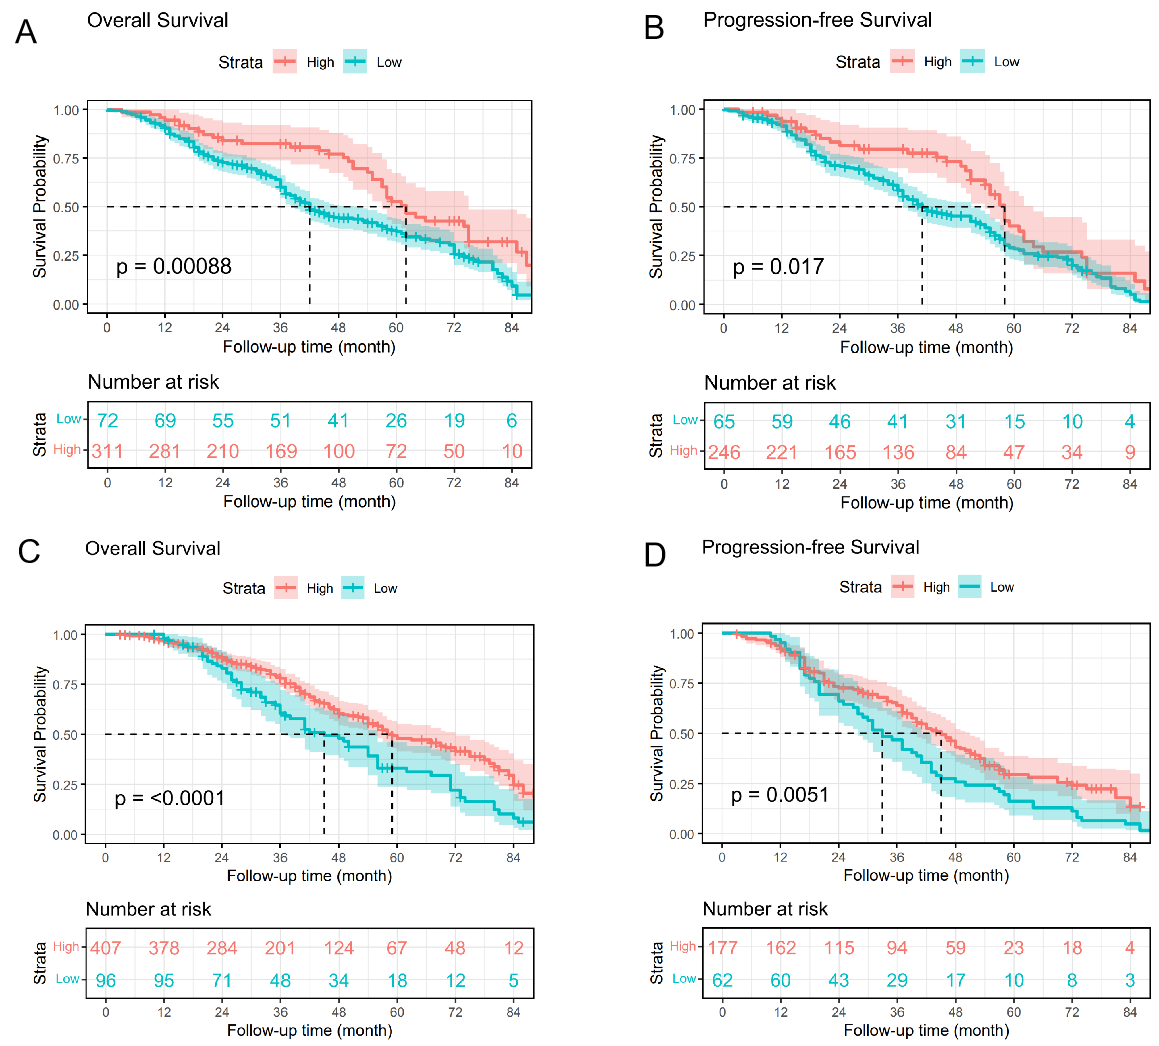


**Figure S2. Kaplan-Meier curve of ANLR based on degree** **TNM subgroup in GC patients(Stage Ⅰ-Ⅱ and Ⅲ-Ⅳ)**


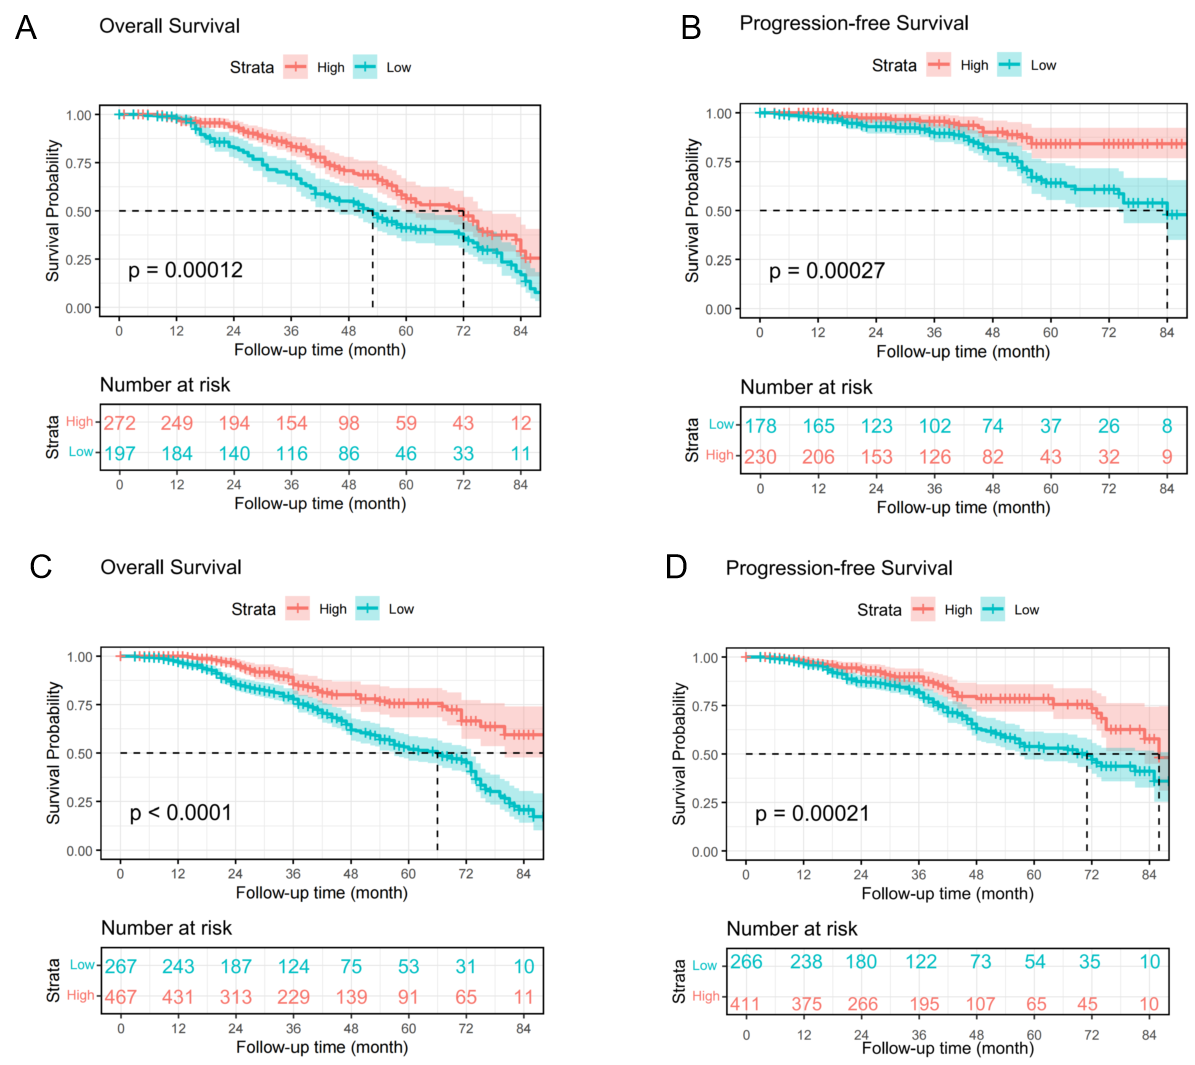


**Figure S3.** The association between ANLR and hazard ratio of Progression-free survival/Overall survival in various subgroups.

A


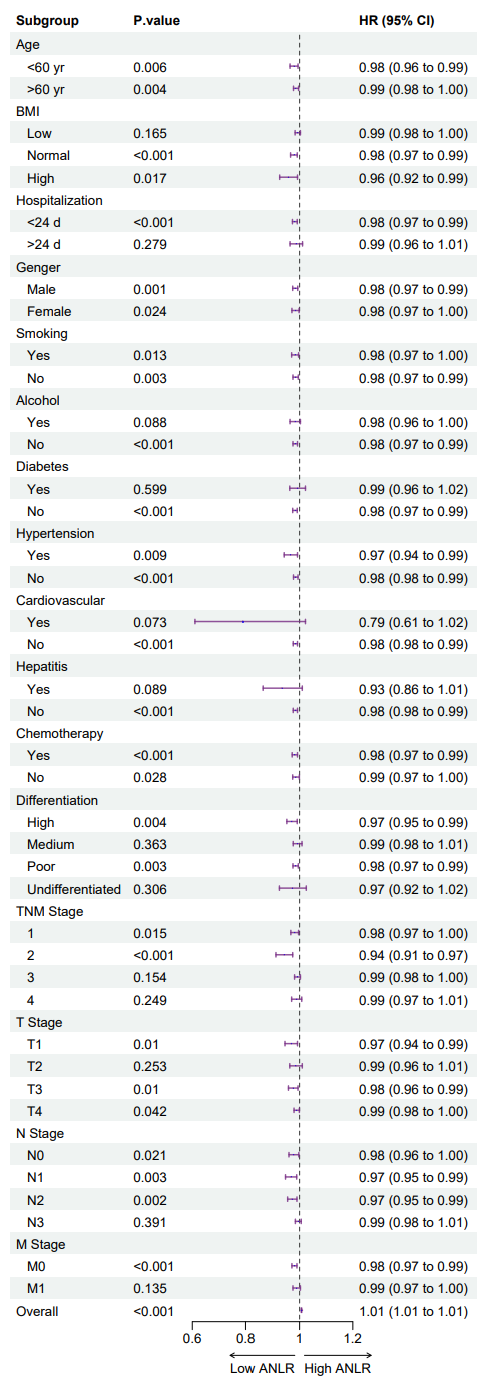

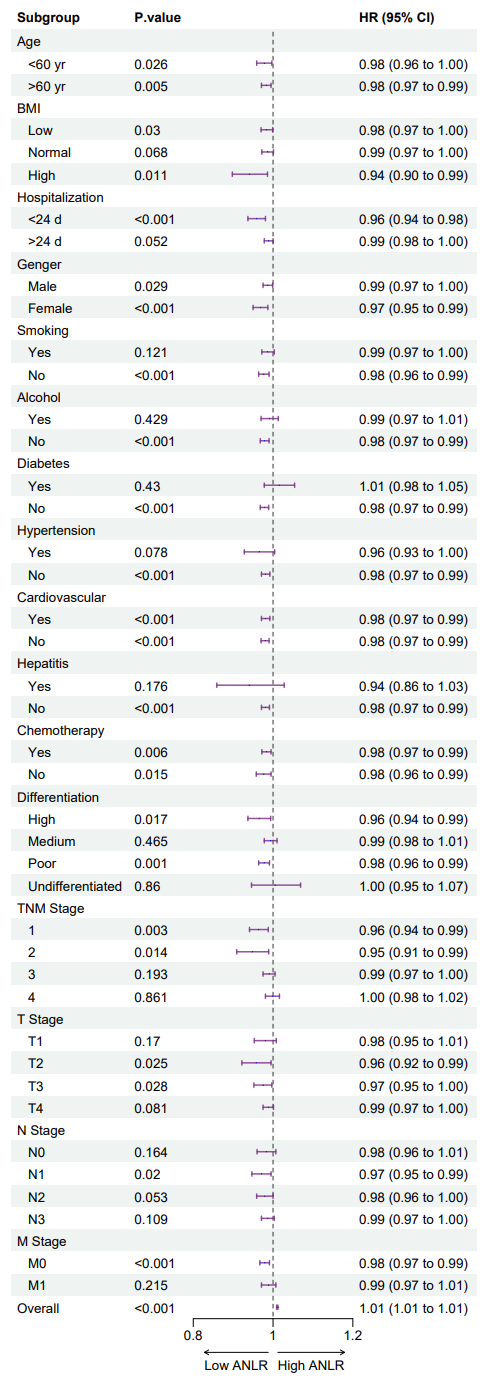


**B**

**
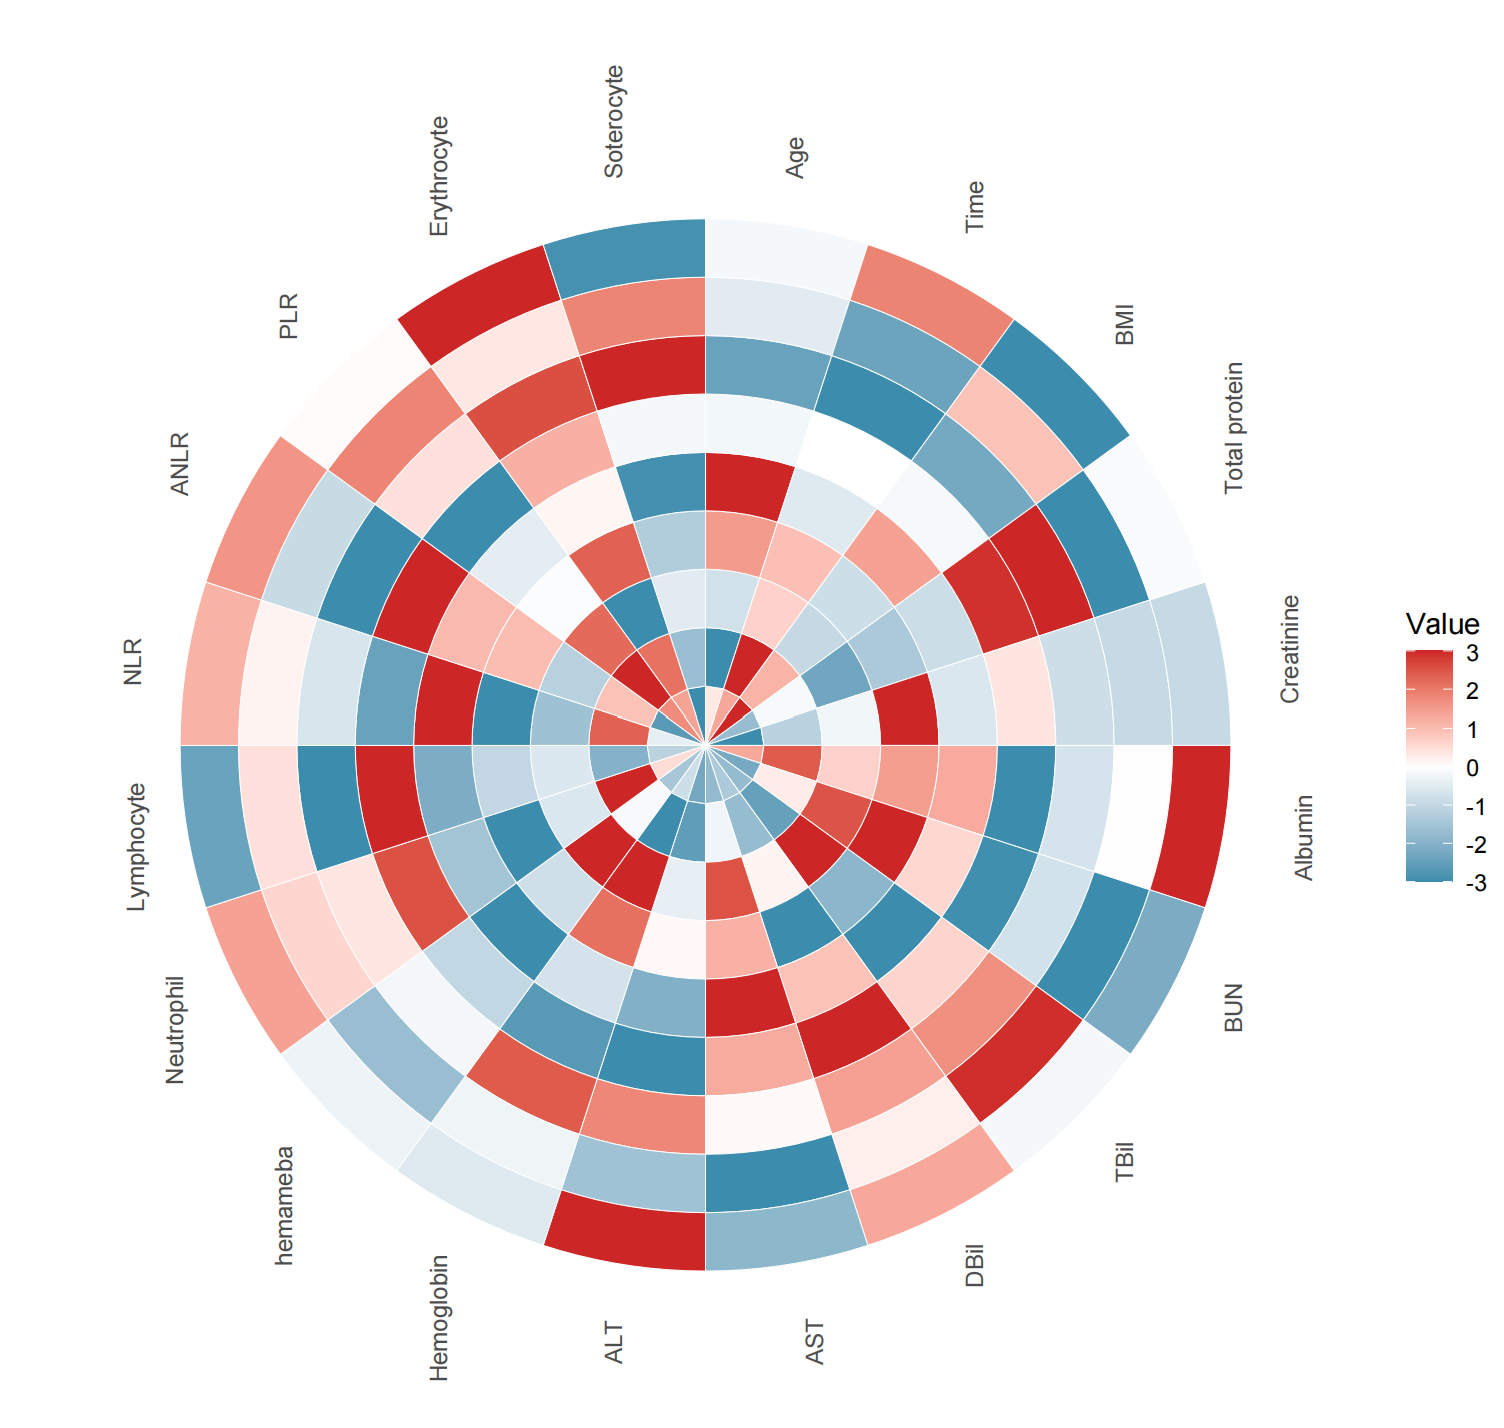
**

**C**

**
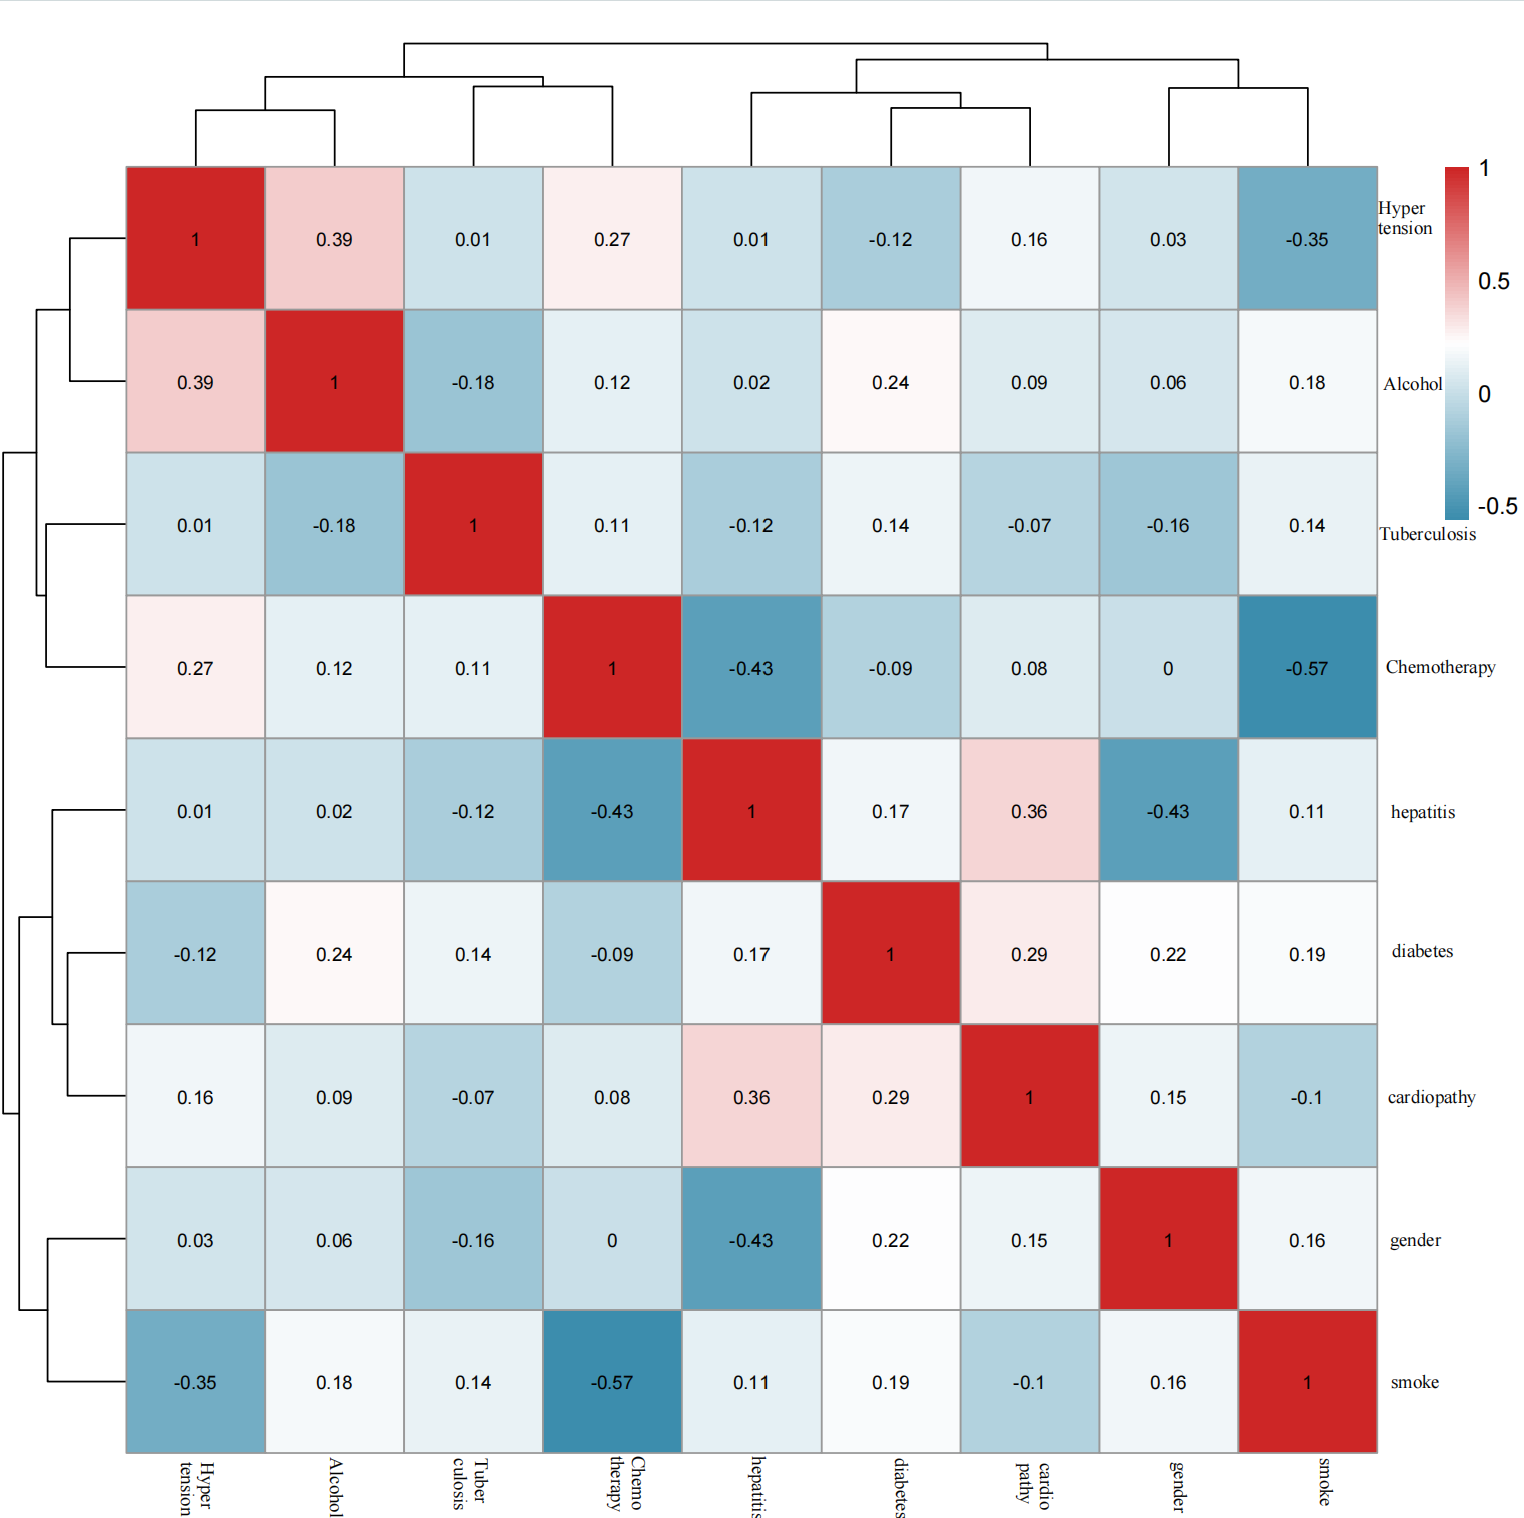
**

**Figure S4.** Comparison of the prognostic value of composite immune inflammatory markers by ROC curve.


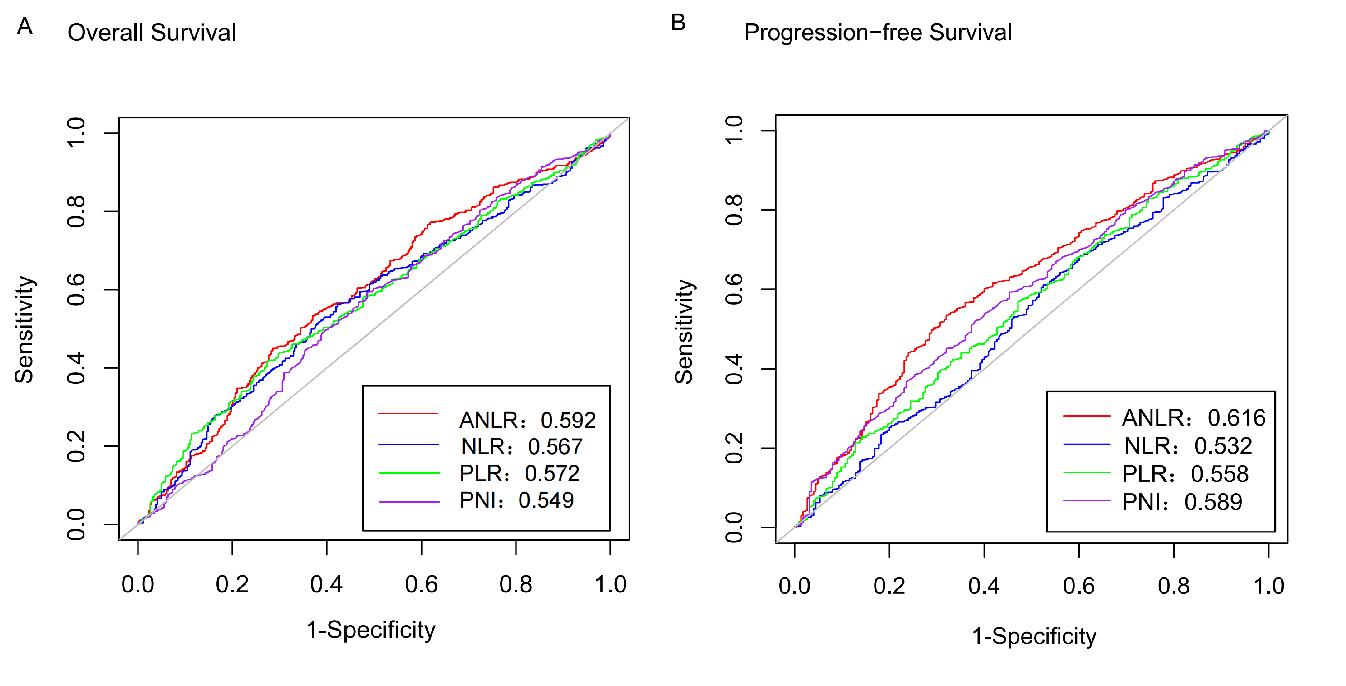


**Figure S5.** The 1-, 3-, and 5-year ROC of OS and PFS.


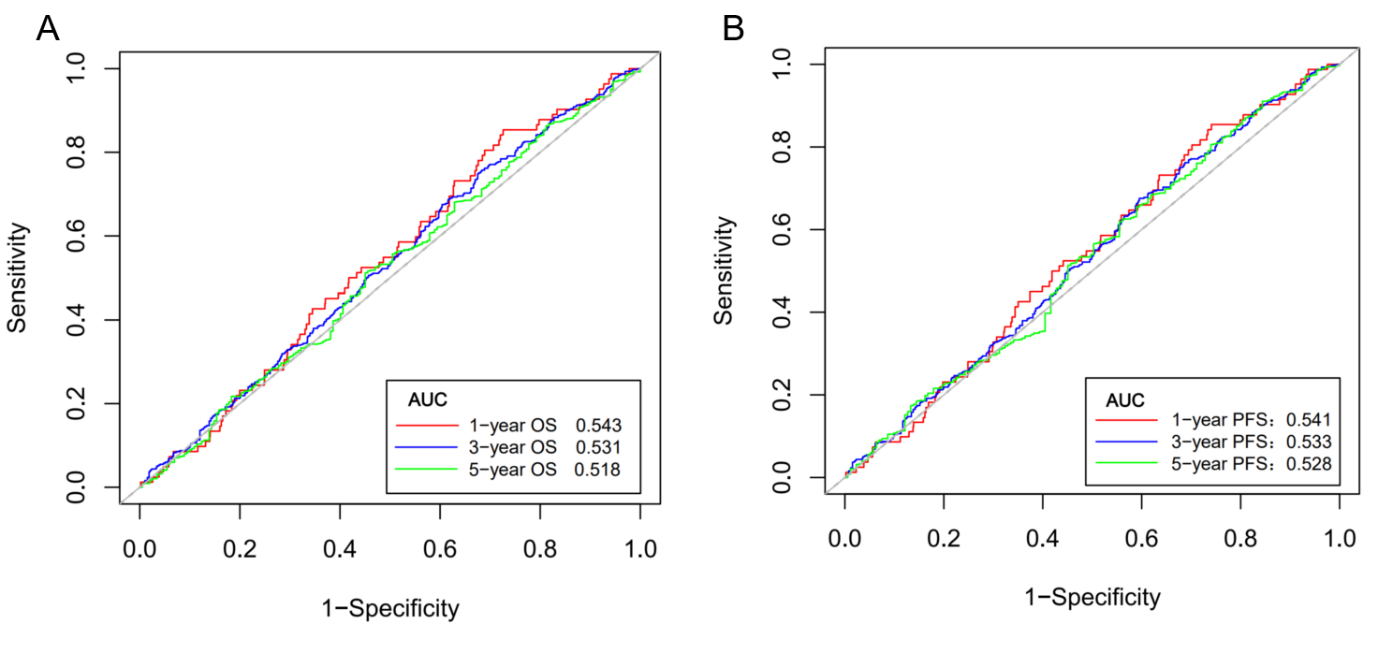
**
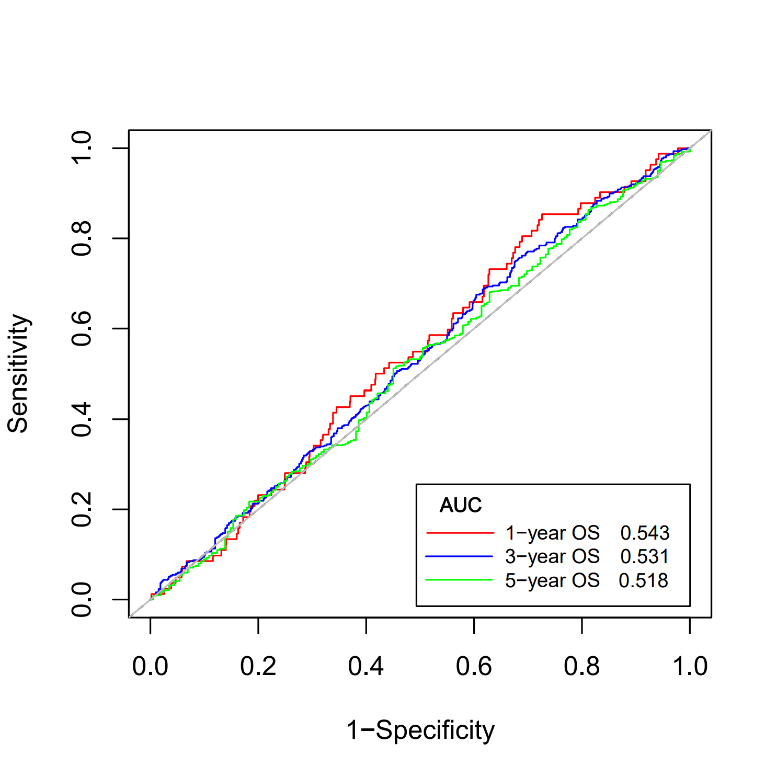
**

**Figure S6.** Comparison of the prognostic value of composite immune inflammatory markers by 1-,3-,5-Year ROC curve.


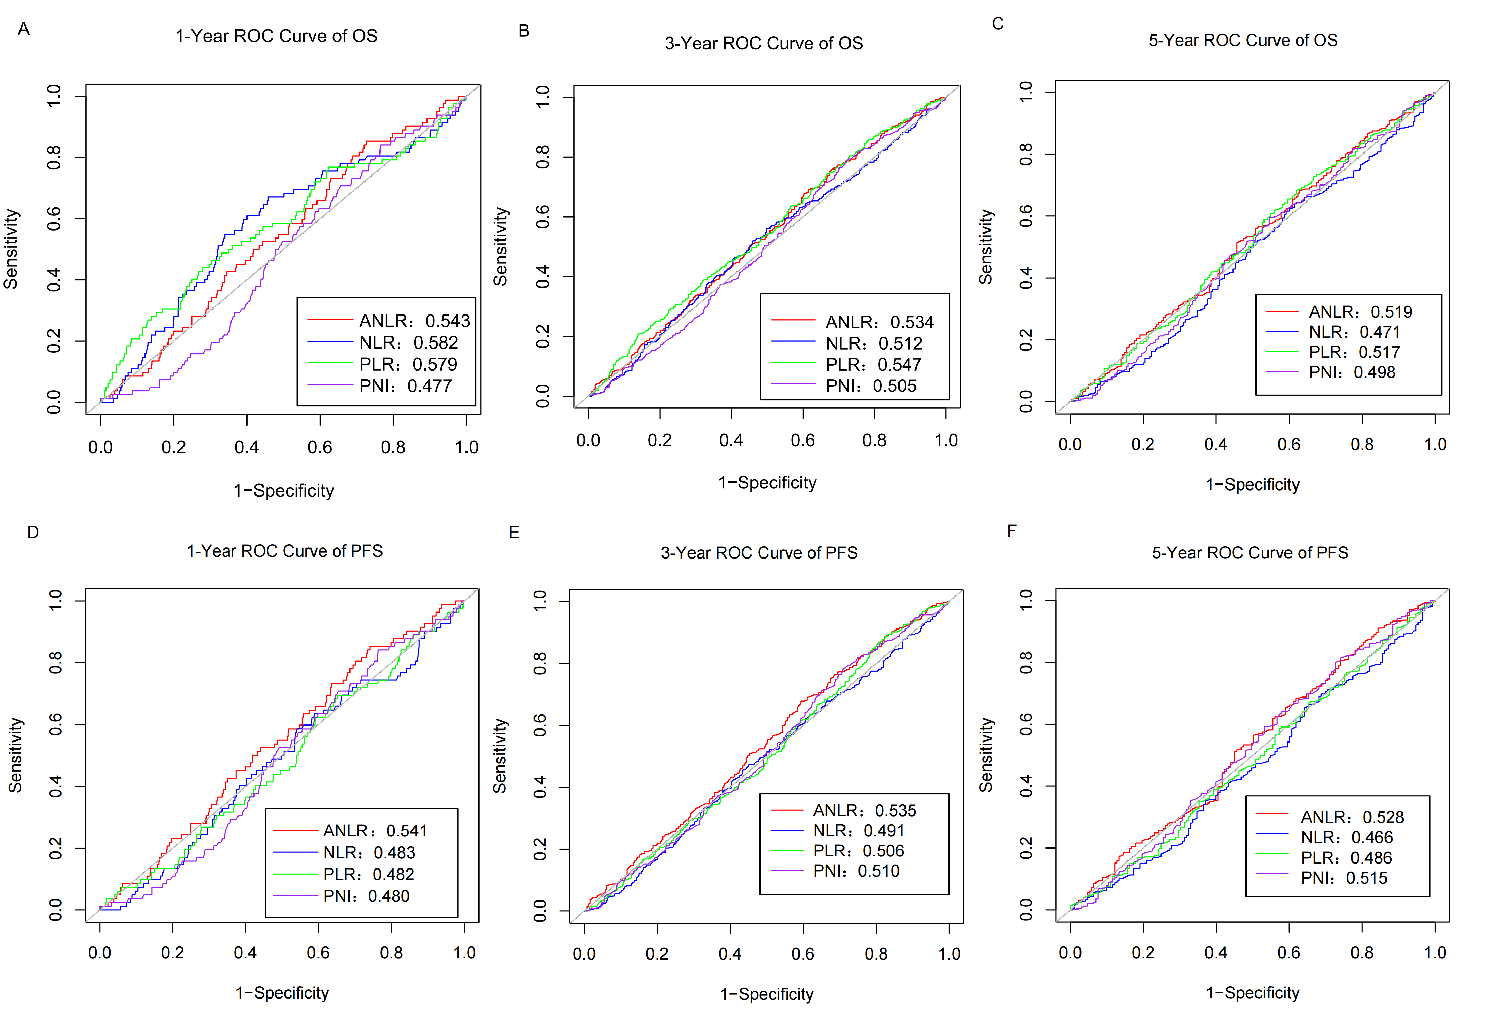


**Figure S7.** The 1-, 3-, and 5-year ROC of OS and PFS nomograms.


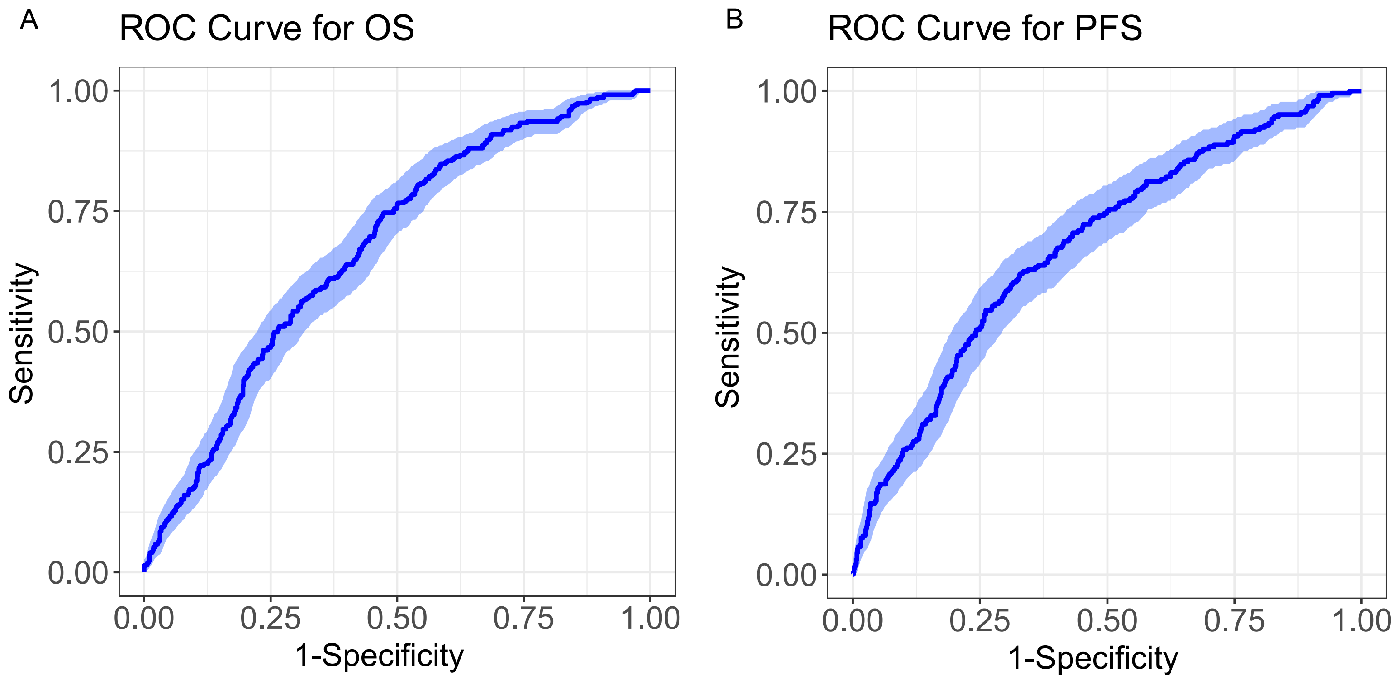


**Figure S8. The 1-,3-,5-Year calibration curve of OS and PFS nomograms.**


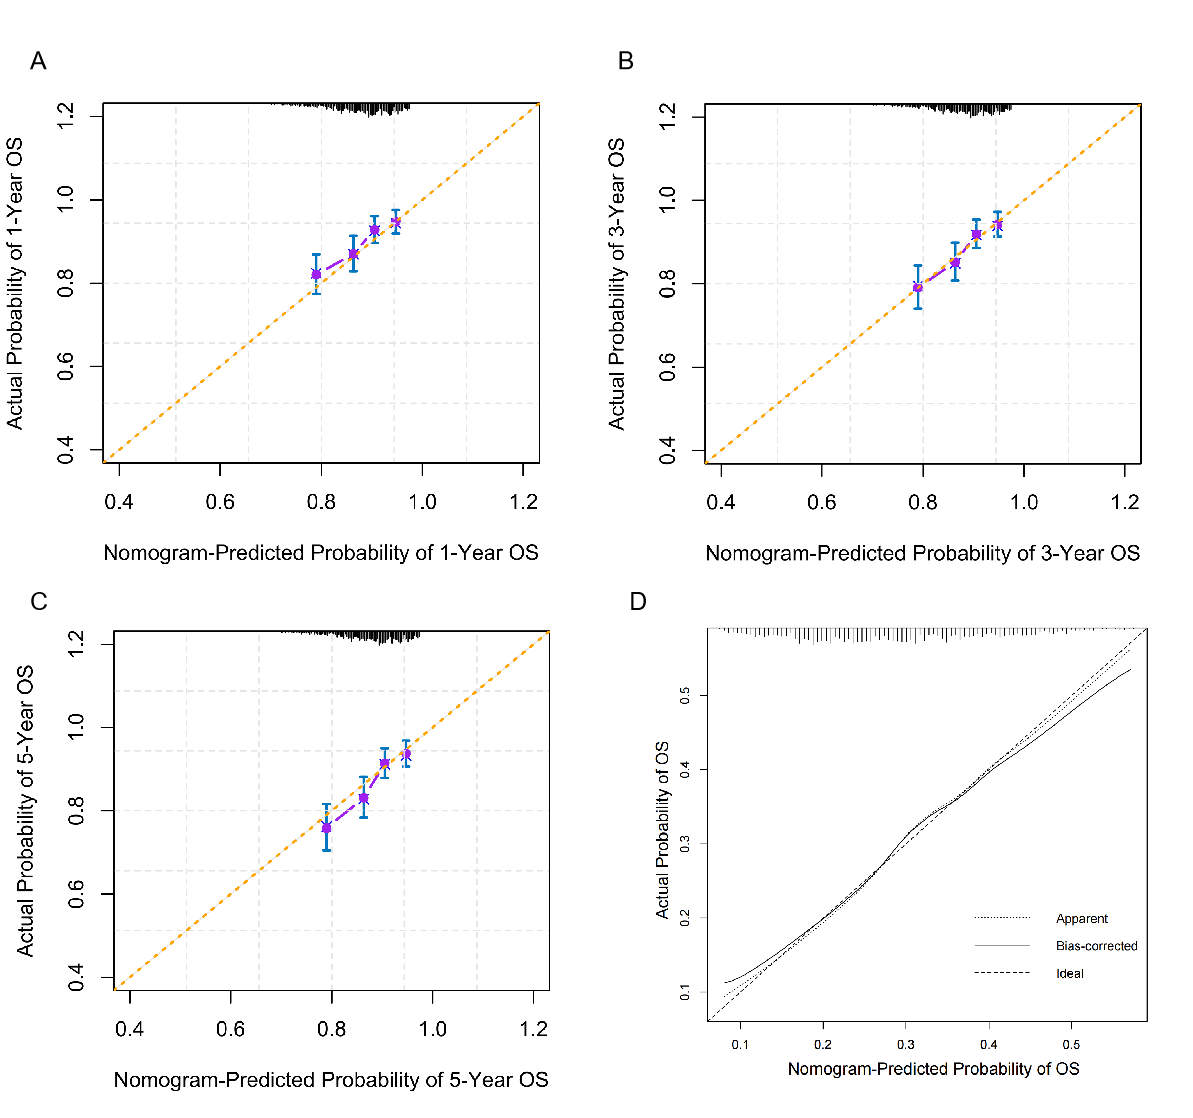


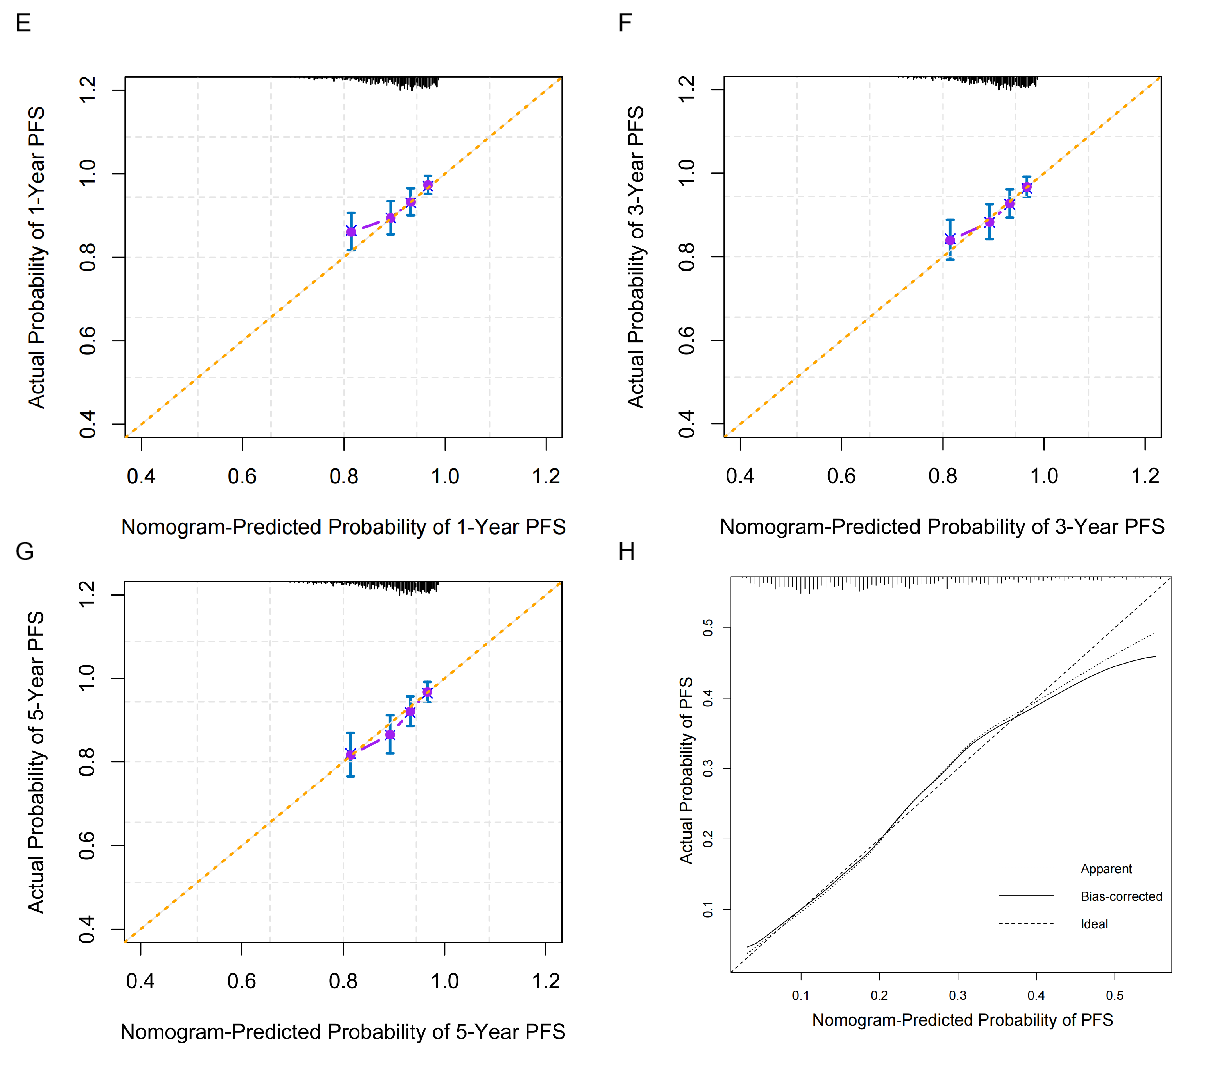


**Figure S9. The 1-,3-,5-Year DCA of OS and PFS nomograms.**


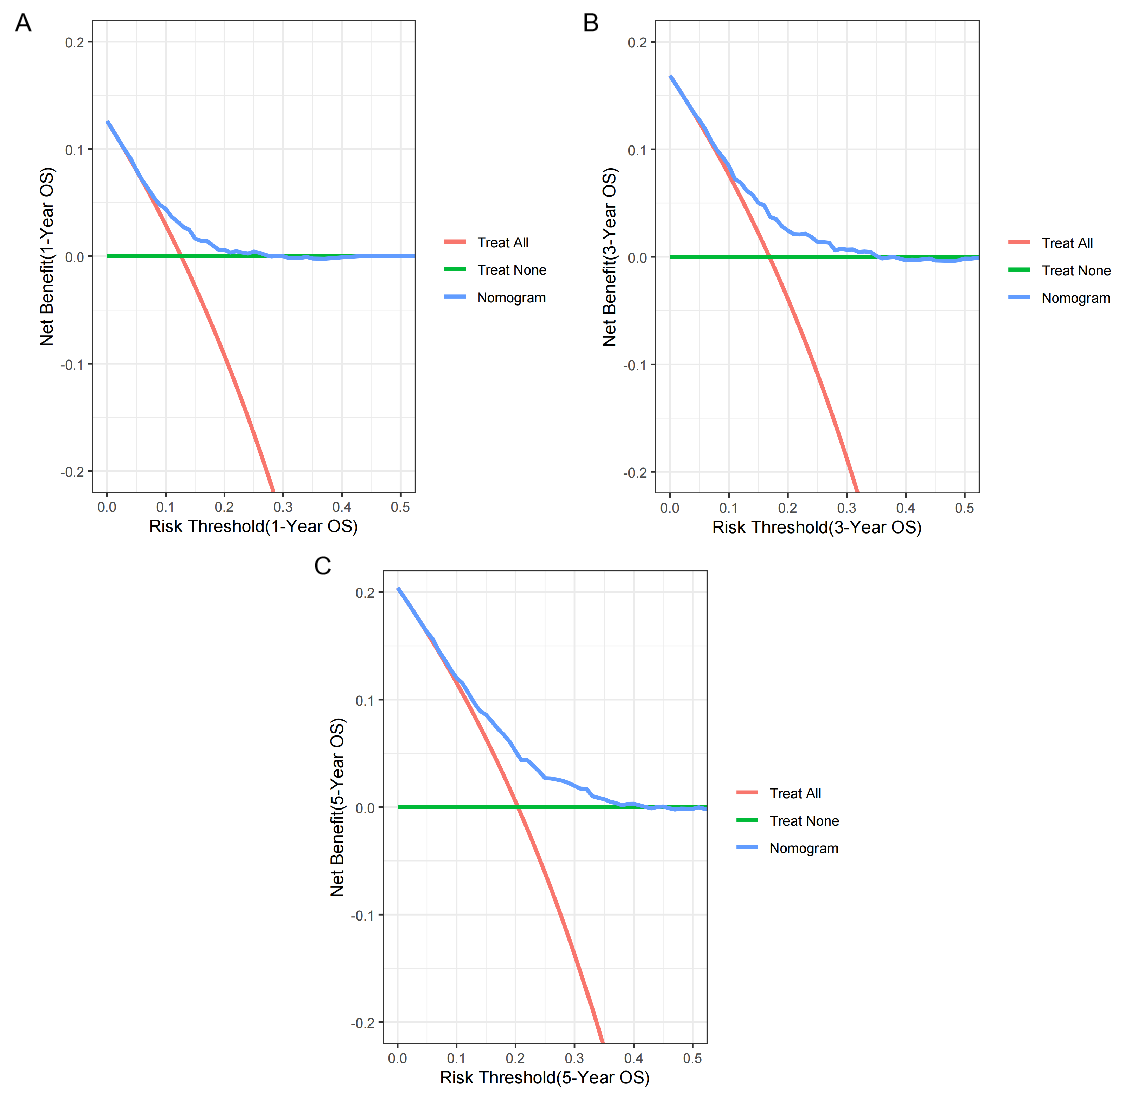


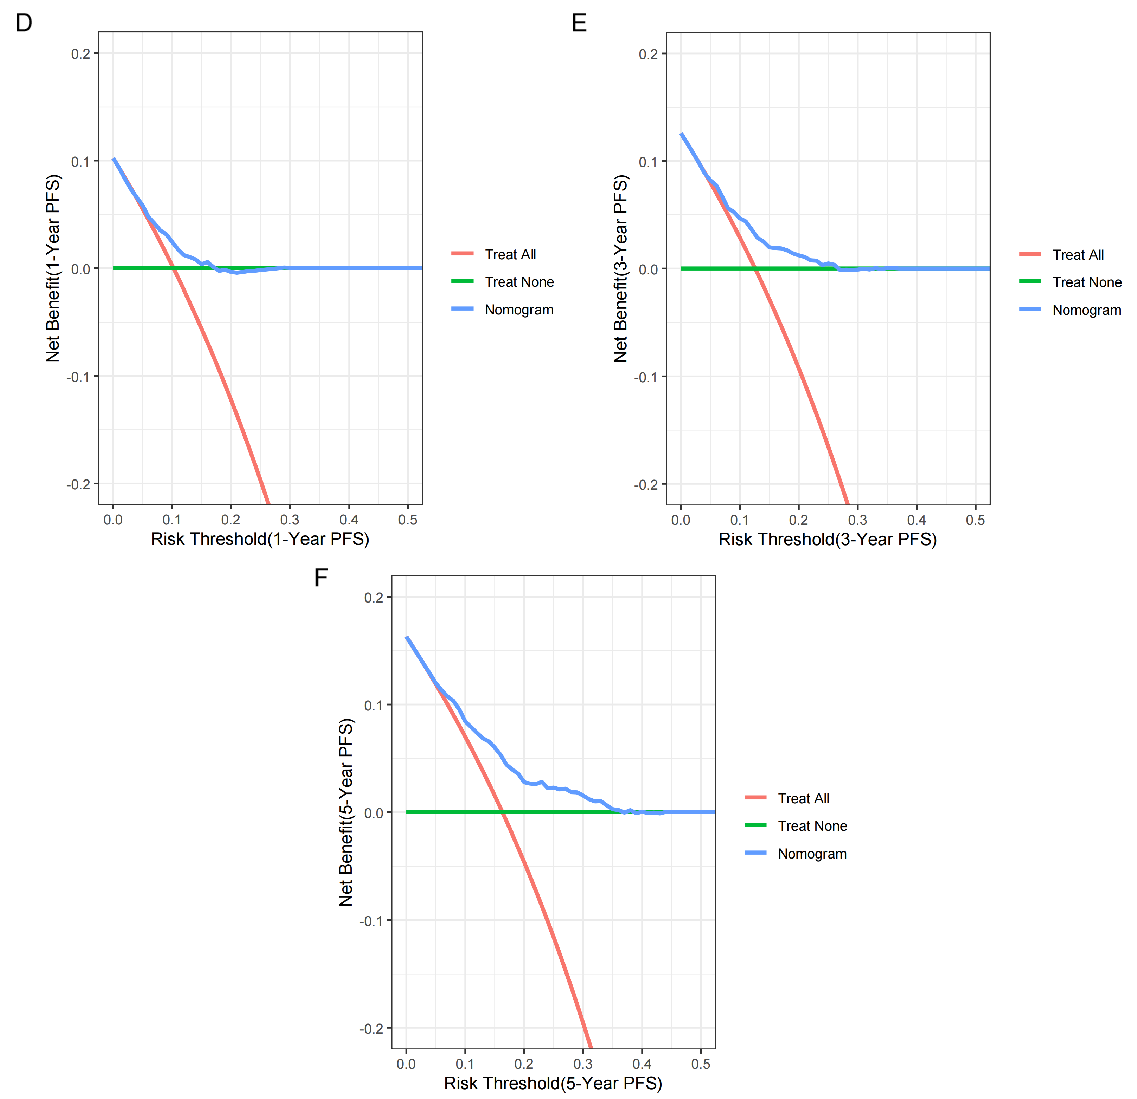


**Figure S10. The nomograms for OS and PFS (****external validation cohort)**


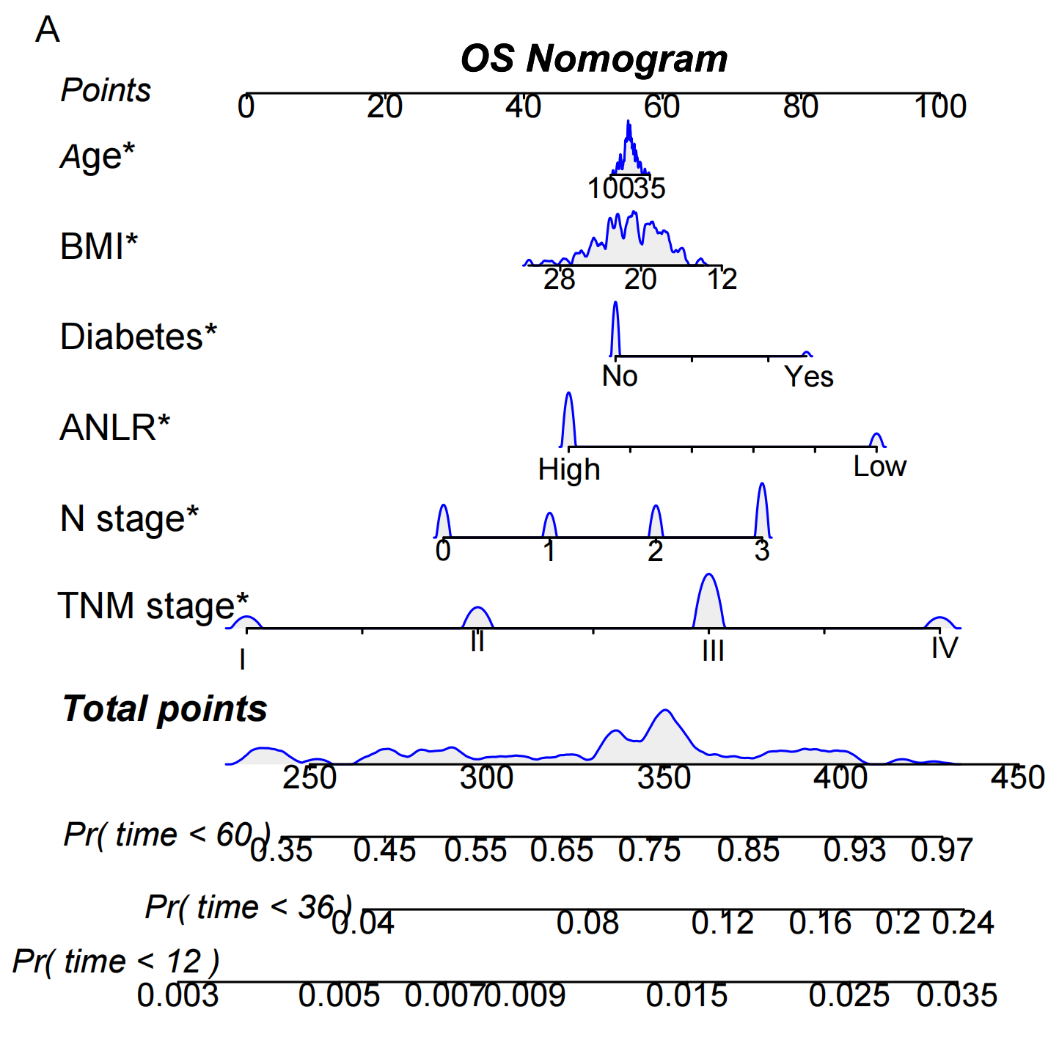


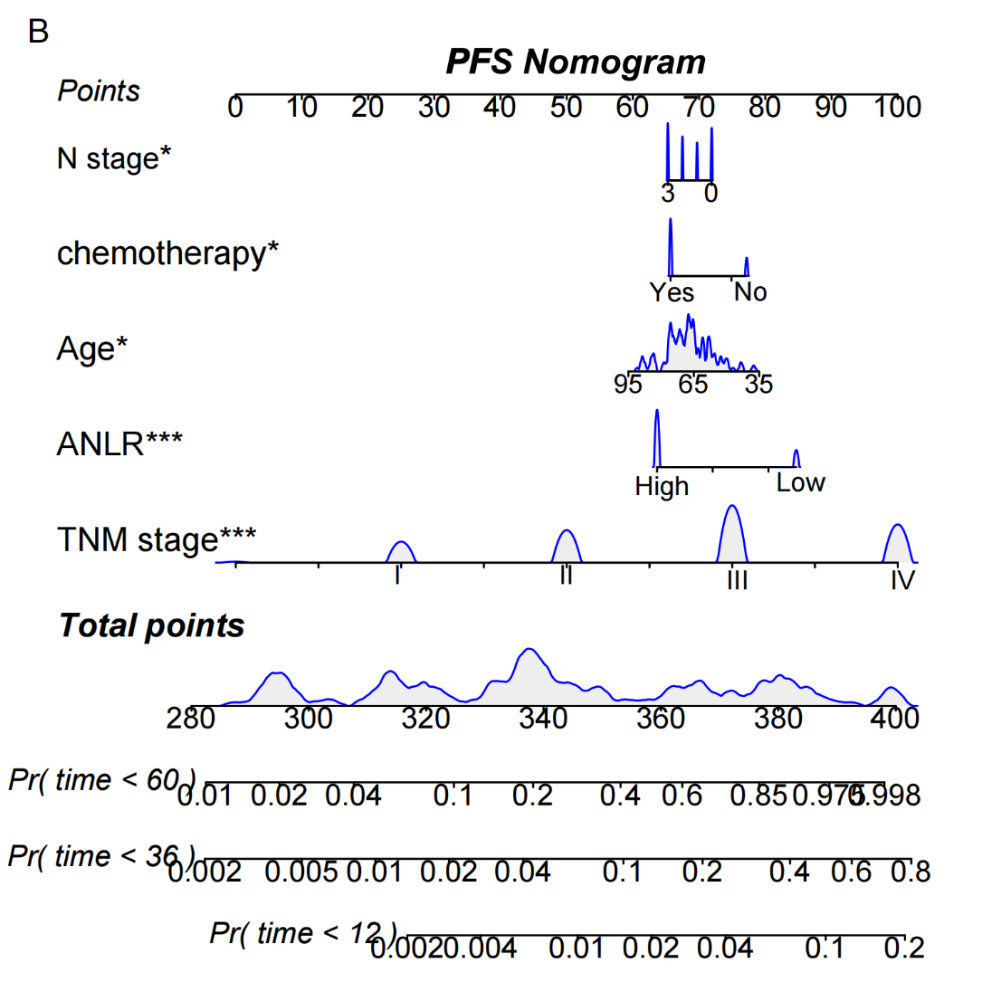


**Figure S11. The ROC of OS and PFS nomograms (external validation cohort)**


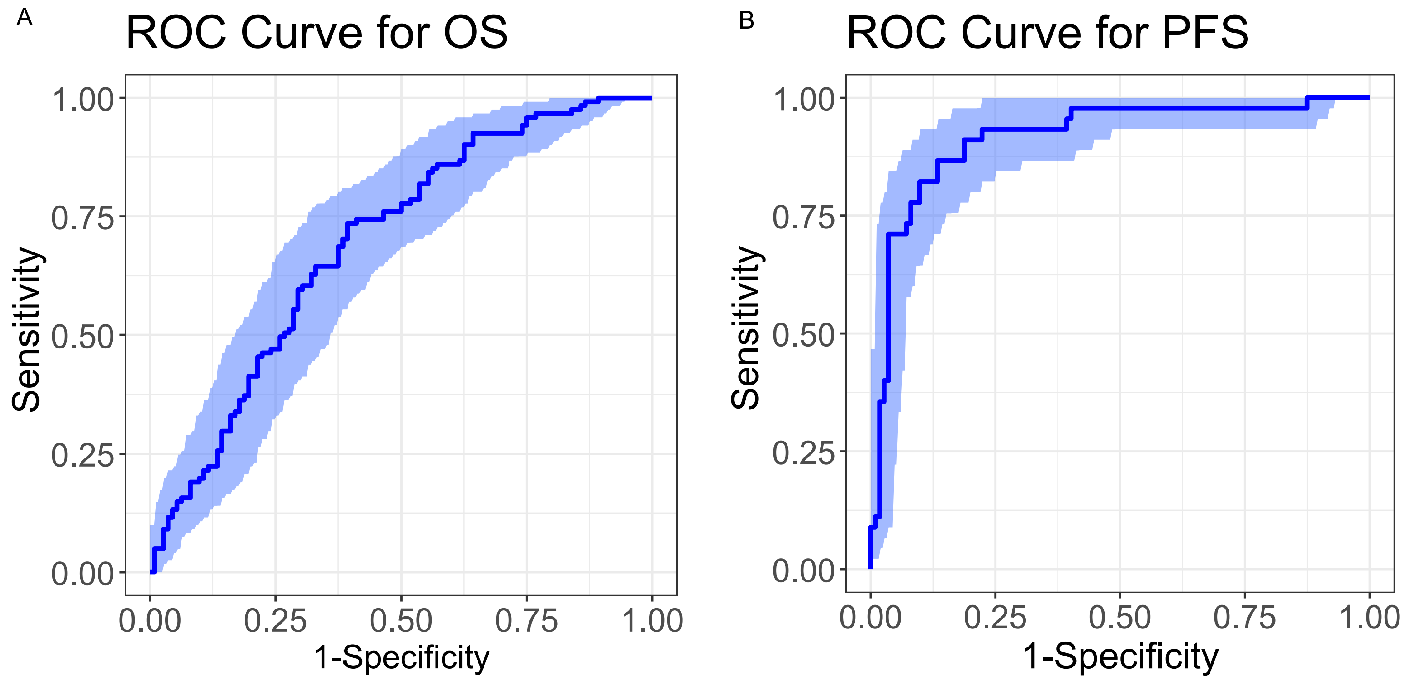


**Figure S12. The calibration curve of OS and PFS nomograms. (external validation cohort)**


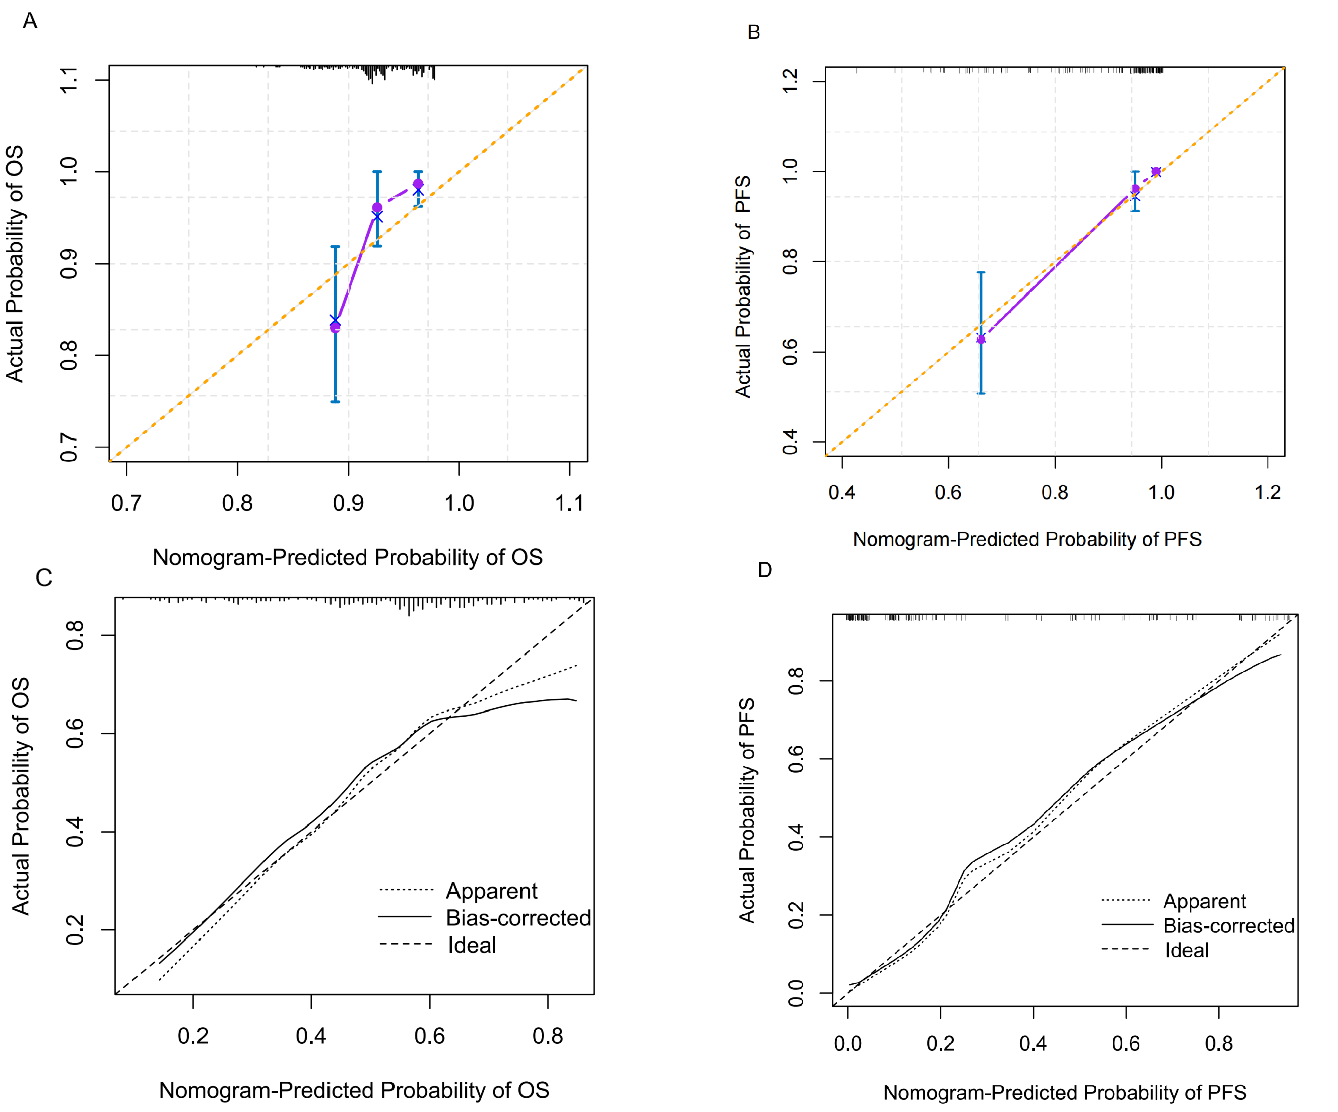


**Figure S13. The DCA of OS and PFS nomograms. (external validation cohort)**


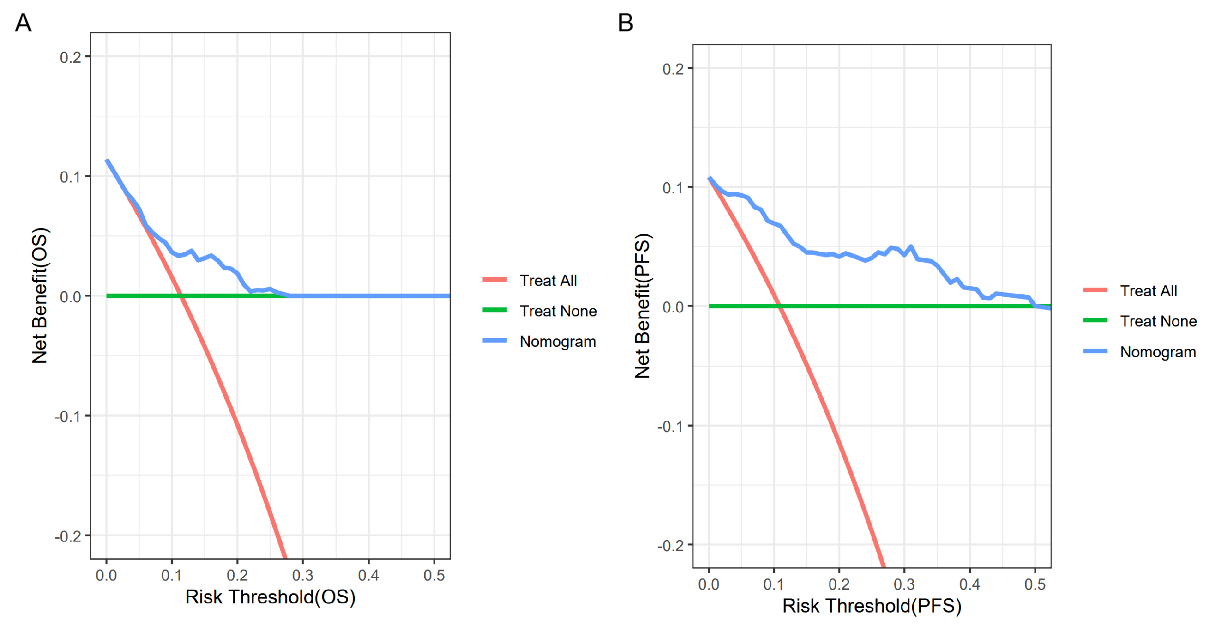


**Table S1 Distribution of predictor variables in internal and temporal cohorts for model for prediction of OS and PFS.**

| Variables | Internal validation cohort | |  | Temporal validation cohort | | |
| --- | --- | --- | --- | --- | --- | --- |
| OS | PFS | OS | PFS | |
| Age（years） | 67.30±11.82 | 66.95±10.99 |  | 69.42±10.14 | 64.67±9.68 |
| BMI（kg/m2） | 19.44±3.30 | 19.25±3.13 |  | 20.78±2.89 | 20.06±3.39 | |
| Hospitalization | 14.94±12.54 | 14.35±12.80 |  | 15.40±9.78 | 11.36±7.42 | |
| Genger  Male  Female | 242（70.6）  101（29.4） | 158（70.2）  67（29.8） |  | 83（68.6）  38（31.4） | 30（66.7）  15（33.3） | |
| Smoking  Yes  No | 161（46.9）  182（53.1） | 96（42.7）  129（57.3） |  | 55（45.5）  66（54.5） | 24（53.3）  21（46.7） | |
| Alcohol  Yes  No | 81（23.6）  262（76.4） | 39（17.3）  186（82.7） |  | 30（24.8）  91（75.2） | 9（20.0）  36（80.0） | |
| Diabetes  Yes  No | 29（8.5）  314（91.5） | 16（7.1）  209（92.9） |  | 8（6.6）  113（93.4） | 2（4.4）  43（95.6） | |
| Hypertension  Yes  No | 54（15.7）  289（84.3） | 23（10.2）  202（89.8） |  | 12（9.9）  109（90.1） | 5（11.1）  40（88.9） | |
| Cardiovascular  Yes  No | 5（1.5）  338（98.5） | 4（1.8）  221（98.2） |  | 7（5.8）  114（94.2） | 1（2.2）  44（97.8） | |
| Chronic hepatitis  Yes  No | 9（2.6）  334（97.4） | 8（3.6）  217（96.4） |  | 5（4.1）  116（95.9） | 2（4.4）  43（95.6） | |
| Tuberculosis  Yes  No | 1（0.3）  342（99.7） | 2（0.9）  223（99.1） |  | 4（3.3）  117（96.7） | 2（4.4）  43（95.6） | |
| Adjuvant Therapy  Yes  No | 187（54.4）  156（45.5） | 150（66.7）  75（33.3） |  | 39（32.2）  82（67.8） | 21（46.7）  24（53.3） | |
| Tumor differentiation  Undifferentiated  Poor  Medium  High | 12（3.5）  204（59.5）  66（19.2）  61（17.8） | 9（4.0）  127（56.4）  57（25.3）  32（14.2） |  | 5（4.1）  77（63.6）  32（26.4）  7（5.8） | 8（17.8）  28（62.2）  7（15.6）  2（4.4） | |
| TNM Stage  Ⅰ  Ⅱ  Ⅲ  Ⅳ | 84（24.5）  41（12.0）  146（42.6）  72（21.0） | 42（18.7）  22（9.8）  94（41.8）  67（29.7） |  | 11（9.1）  18（14.9）  75（62.0）  17（14.0） | 1（2.2.）  3（6.7）  7（15.6）  34（75.6） | |
| T Stage  T1  T2  T3  T4 | 40（11.7）  46（13.4）  85（24.8）  172（50.1） | 21（9.3）  26（11.6）  57（25.3）  121（53.8） |  | 11（9.1）  10（8.3）  47（38.8）  53（43.8） | 6（13.3）  6（13.3）  15（33.3）  18（40.0） | |
| N Stage  N0  N1  N2  N3 | 62（18.1）  66（19.2）  84（24.5）  131（38.2） | 32（14.2）  44（19.6）  58（25.8）  91（40.4） |  | 19（15.7）  20（16.5）  28（23.1）  54（44.6） | 9（20.0）  11（24.4）  12（26.7）  13（28.9） | |
| M Stage  M0  M1 | 241（70.3）  102（29.7） | 163（72.4）  62（27.6） |  | 103（85.1）  18（14.9） | 26（57.8）  19（42.2） | |
| Leukocyte （109/L） | 6.02±2.89 | 6.17±3.56 |  | 7.84±3.76 | 6.09±2.84 | |
| Neutrophil （109/L） | 7.64±4.52 | 6.00±9.86 |  | 5.60±3.61 | 3.93±2.72 | |
| Platelet （109/L） | 208.42±102.84 | 202.14±104.28 |  | 234.47±103.19 | 204.60±91.85 | |
| Lymphocyte（109/L） | 2.42±1.80 | 1.97±0.95 |  | 1.39±0.91 | 1.50±0.73 | |
| Hemoglobin （g/L） | 110.37±24.94 | 107.87±25.42 |  | 109.04±23.66 | 109.76±24.00 | |
| Albumin （g/dL） | 38.06±5.86 | 38.94±24.60 |  | 34.64±4.31 | 35.71±4.47 | |
| Total bilirubin | 16.31±11.08 | 16.34±14.40 |  | 17.36±3.84 | 15.36±17.82 | |
| Direct bilirubin | 7.01±5.19 | 6.81±1.07 |  | 6.16±3.08 | 5.04±6.01 | |
| Total cholesterol | 4.56±3.44 | 4.42±1.70 |  | 4.16±1.13 | 4.88±3.54 | |
| Triglycerides | 1.24±1.02 | 1.13±0.79 |  | 1.21±0.48 | 1.18±0.47 | |
| AST | 30.59±25.58 | 32.93±31.90 |  | 33.98±34.58 | 32.83±23.59 | |
| ALT | 27.17±11.73 | 28.85±26.67 |  | 36.73±26.09 | 30.94±30.40 | |
| Creatinine | 67.44±23.91 | 69.66±25.84 |  | 62.50±20.22 | 64.35±15.07 | |
| Urea nitrogen | 9.07±2.72 | 6.08±4.71 |  | 6.41±5.17 | 20.66±13.25 | |
| C-reactive protein | 20.93±16.92 | 14.54±11.68 |  | 38.00±20.64 | 18.63±14.04 | |
| ANLR | 17.03±14.71 | 16.64±7.35 |  | 14.79±10.69 | 20.94±20.16 | |
| NLR | 4.71±3.67 | 4.91±6.64 |  | 6.09±5.63 | 3.87±2.20 | |
| PLR | 174.16±112.93 | 200.95±160.98 |  | 309.29±193.72 | 171.86±119.04 | |

**Table S2 Overall survival characteristics of GC patients**

| Variables | Overall survival | |
| --- | --- | --- |
| High-ANLR | Low-ANLR | |
| Age（years） | 64.79±13.04 | 68.30±11.17 | |
| BMI（kg/m2） | 19.55±3.23 | 19.39±3.32 | |
| Hospitalization (day) | 11.77±10.59 | 16.18±13.00 | |
| Genger  Male  Female | 64(65.3)  34(34.7) | 178(72.7)  67(27.3) | |
| Smoking  Yes  No | 37(37.8)  61(62.2) | 124(50.6)  121(49.4) | |
| Alcohol  Yes  No | 21(21.4)  77(78.6) | 60(24.5)  185(75.5) | |
| Diabetes  Yes  No | 8(8.2)  90(91.8) | 21(8.6)  224(91.4) | |
| Hypertension  Yes  No | 12(12.2)  86(87.8) | 42(17.1)  203(82.9) | |
| Cardiovascular  Yes  No | 1(1)  97(99.0) | 4(1.6)  241(98.4) | |
| Chronic hepatitis  Yes  No | 2(2.0)  96(98.0) | 7(2.9)  238(97.1) | |
| Adjuvant Therapy  Yes  No | 49(50.0)  49(50.0) | 138(56.3)  107(43.7) | |
| Tumor differentiation  Undifferentiated  Poor  Medium  High | 4(4.1)  63(64.3)  18(18.4)  13(13.3) | 8(3.3)  141(57.6)  48(19.6)  48(19.6) | |
| TNM Stage  Ⅰ  Ⅱ  Ⅲ  Ⅳ | 25(25.5)  9(9.2)  47(48.0)  17(17.3) | 59(24.1)  32(13.1)  99(40.4)  55(22.4) | |
| T Stage  T1  T2  T3  T4 | 12(12.2)  13(13.3)  24(24.5)  49(50.0) | 28(11.4)  33(13.5)  61(24.9)  123(50.2) | |
| N Stage  N0  N1  N2  N3 | 17(17.3)  15(15.3)  28(28.6)  38(38.8) | 45(18.4)  51(20.8)  56(22.9)  93(38.0) | |
| M Stage  M0  M1 | 67(68.4)  31(31.6) | 174(71.0)  71(29.0) | |
| Leukocyte （109/L） | 4.45±1.61 | 6.63±3.03 | |
| Neutrophil （109/L） | 4.82±1.97 | 8.62±5.51 | |
| Platelet （109/L） | 203.17±105.42 | 209.53±100.60 | |
| Lymphocyte （I109/L） | 3.99±9.01 | 1.77±3.53 | |
| Hemoglobin （g/L） | 112.00±23.572 | 109.73±25.34 | |
| Albumin （g/dL） | 40.63±4.71 | 36.90±5.89 | |
| Total bilirubin | 66.84±9.80 | 64.95±8.28 | |
| Direct bilirubin | 4.33±3.33 | 7.88±1.73 | |
| Total cholesterol | 4.43±1.92 | 17.40±14.12 | |
| Triglycerides | 1.21±1.05 | 1.25±1.01 | |
| AST | 25.25±11.76 | 32.34±27.06 | |
| ALT | 23.10±13.34 | 28.40±36.12 | |
| Creatinine | 67.35±22.93 | 67.41±24.28 | |
| Urea nitrogen | 10.39±3.83 | 8.21±2.39 | |
| C-reactive protein | 8.51±1.20 | 24.47±19.98 | |
| ANLR | 23.10±13.34 | 10.27±5.67 | |
| NLR | 1.28±1.04 | 6.01±7.40 | |
| PLR | 114.90±62.20 | 200.88±117.10 | |
| PNI | 60.56±45.18 | 45.74±18.36 | |

**Table S3 Progression-free survival characteristics of GC patients**

| Variables | Progression-free survival | |
| --- | --- | --- |
| High-ANLR | Low-ANLR | |
| Age（years） | 66.46±10.80 | 67.11±11.07 | |
| BMI（kg/m2） | 19.73±2.22 | 19.09±3.37 | |
| Hospitalization (day) | 12.54±11.29 | 15.05±13.17 | |
| Genger  Male  Female | 41(71.9)  16(28.1) | 117(69.6)  51(30.4) | |
| Smoking  Yes  No | 22(38.6)  35(61.4) | 74(44.0)  94(56.0) | |
| Alcohol  Yes  No | 12(21.1)  45(78.9) | 27(16.1)  141(83.9) | |
| Diabetes  Yes  No | 5(8.8)  52(91.2) | 11(6.5)  157(93.5) | |
| Hypertension  Yes  No | 3(5.3)  54(94.7) | 20(11.9)  148(88.1) | |
| Cardiovascular  Yes  No | 2(3.5)  55(96.5) | 2(1.1)  166(98.8) | |
| Chronic hepatitis  Yes  No | 2(3.5)  55(96.5) | 6(3.6)  (162)96.4 | |
| Adjuvant Therapy  Yes  No | 34(59.6)  23(40.4) | 116(69.0)  52(31.0) | |
| Tumor differentiation  Undifferentiated  Poor  Medium  High | 2(3.5)  31(54.4)  16(28.1)  8(14.0) | 7(4.2)  96(57.1)  41(24.4)  24(14.3) | |
| TNM Stage  Ⅰ  Ⅱ  Ⅲ  Ⅳ | 10(14.0)  5(8.8)  27(47.4)  1(1.8) | 32(19.1)  17(10.1)  67(39.9)  52(31.0) | |
| T Stage  T1  T2  T3  T4 | 8(14.0)  5(8.8)  14(24.6)  30(52.6) | 13(7.7)  21(12.5)  43(25.6)  91(54.2) | |
| N Stage  N0  N1  N2  N3 | 11(19.3)  12(21.1)  13(22.8)  21(36.8) | 21(12.5)  32(19.0)  45(26.8)  70(41.7) | |
| M Stage  M0  M1 | 45(78.9)  12(21.1) | 118(70.2)  50(29.8) | |
| Leukocyte （109/L） | 4.30±1.72 | 6.74±3.79 | |
| Neutrophil （109/L） | 4.62±1.66 | 6.36±9.47 | |
| Platelet （109/L） | 182.40±105.38 | 206.67±103.18 | |
| Lymphocyte （I109/L） | 3.82±1.02 | 1.32±1.08 | |
| Hemoglobin （g/L） | 111.07±26.12 | 107.00±24.91 | |
| Albumin （g/dL） | 45.62±7.00 | 36.57±6.32 | |
| Total bilirubin | 68.32±5.87 | 17.49±7.53 | |
| Direct bilirubin | 3.69±1.68 | 7.69±1.20 | |
| Total cholesterol | 4.77±2.71 | 4.31±1.23 | |
| Triglycerides | 0.89±0.30 | 1.21±0.88 | |
| AST | 32.42±35.74 | 32.75±30.17 | |
| ALT | 30.75±6.04 | 27.78±22.46 | |
| Creatinine | 70.12±24.07 | 69.45±26.33 | |
| Urea nitrogen | 5.46±1.61 | 6.22±5.21 | |
| C-reactive protein | 13.89±5.52 | 14.71±2.79 | |
| ANLR | 36.52±23.78 | 10.10±5.54 | |
| NLR | 1.32±0.40 | 6.05±2.25 | |
| PLR | 110.25±61.81 | 229.34±227.62 | |
| PNI | 64.71±60.21 | 43.16±11.14 | |

**Table S4. The association between ANLR and hazard ratio of Overall survival in various subgroups.**

| Variables | Internal validation cohort | HR(95%CI) | | | P | |
| --- | --- | --- | --- | --- | --- | --- |
| All patients | 343 | | 1.007(1.006-1.008) | <0.001 | |
| Age（years）  <60  ≥60 | 150(43.7)  193(56.3) | | 0.979(0.964-0.994)  0.986(0.977-0.996) | 0.006  0.004 | |
| BMI（kg/m2）  ＜18.5  ≥18.5＜24  ≥24 | 85(24.78)  140(40.82)  118(34.40) | | 0.993(0.983-1.003)  0.979(0.966-0.991)  0.958(0.925-0.992) | 0.165  <0.001  0.017 | |
| Hospitalization  <24  ≥24 | 124(36.15)  219(63.85) | | 0.982(0.973-0.991)  0.987(0.964-1.011) | <0.001  0.279 | |
| Genger  Male  Female | 242(70.6)  101(29.4) | | 0.983(0.974-0.993)  0.985(0.971-0.998) | 0.001  0.024 | |
| Smoking  Yes  No | 161(46.9)  182(53.1) | | 0.983(0.970-0.996)  0.985(0.975-0.995) | 0.013  0.003 | |
| Alcohol  Yes  No | 81(23.6)  262(76.4) | | 0.983(0.964-1.003)  0.983(0.975-0.992) | 0.088  <0.001 | |
| Diabetes  Yes  No | 29(8.5)  314(91.5) | | 0.992(0.963-1.022)  0.983(0.974-0.991) | 0.599  <0.001 | |
| Hypertension  Yes  No | 54(15.7)  289(84.3) | | 0.966(0.942-0.992)  0.985(0.977-0.994) | 0.009  <0.001 | |
| Cardiovascular  Yes  No | 5(1.5)  338(98.5) | | 0.790(0.610-1.022)  0.984(0.976-0.992) | 0.073  <0.001 | |
| Chronic hepatitis  Yes  No | 9(2.6)  334(97.4) | | 0.934(0.863-1.010)  0.984(0.976-0.992) | 0.089  <0.001 | |
| Tuberculosis  Yes  No | 1(0.3)  342(99.7) | | 1.035(0.145-7376)  0.983(0.976-0.991) | 0.973  <0.001 | |
| Adjuvant  Yes  No | 187(54.4)  156(45.5) | | 0.982(0.972-0.992)  0.986(0.974-0.999) | <0.001  0.028 | |
| Differentiation  Undifferentiated  Poor  Medium  High | 12(3.5)  204(59.5)  66(19.2)  61(17.8) | | 0.973(0.924-1.025)  0.985(0.975-0.995)  0.992(0.976-1.009)  0.971(0.952-0.991) | 0.306  0.003  0.363  0.004 | |
| TNM Stage  Ⅰ  Ⅱ  Ⅲ  Ⅳ | 84(24.5)  41(12.0)  146(42.6)  72(21.0) | | 0.982(0.967-0.996)  0.942(0.911-0.974)  0.992(0.981-1.003)  0.989(0.970-1.008) | 0.015  <0.001  0.154  0.249 | |
| T Stage  T1  T2  T3  T4 | 40(11.7)  46(13.4)  85(24.8)  172(50.1) | | 0.969(0.945-0.992)  0.986(0.963-1.010)  0.976(0.958-0.994)  0.989(0.979-0.999) | 0.010  0.253  0.010  0.042 | |
| N Stage  N0  N1  N2  N3 | 62(18.1)  66(19.2)  84(24.5)  131(38.2) | | 0.978(0.960-0.997)  0.968(0.947-0.989)  0.972(0.955-0.990)  0.995(0.984-1.006) | 0.021  0.003  0.002  0.391 | |
| M Stage  M0  M1 | 241(70.3)  102(29.7) | | 0.981(0.971-0.990)  0.989(0.975-1.003) | <0.001  0.135 | |
| Leukocyte (109/L) | 6.02±2.89 | | 0.996(0.971-1.021) | 0.726 | |
| Neutrophil (109/L) | 7.64±4.52 | | 1.001(0.994-1.009) | 0.714 | |
| Platelet (109/L) | 208.42±102.84 | | 1.000(0.999-1.001) | 0.747 | |
| Lymphocyte(109/L) | 2.42±1.80 | | 0.982(0.964-1.001) | 0.062 | |
| Hemoglobin (g/L) | 110.37±24.94 | | 0.998(0.993-1.002) | 0.251 | |
| Albumin (g/dL) | 38.06±5.86 | | 0.977(0.960-0.993) | 0.007 | |
| Total bilirubin | 16.31±11.08 | | 1.005(1.001-1.010) | 0.024 | |
| Direct bilirubin | 7.01±5.19 | | 1.008(1.001-1.014) | 0.020 | |
| AST | 30.59±25.58 | | 1.000(0.997-1.003) | 0.910 | |
| ALT | 27.17±11.73 | | 0.999(0.996-1.003) | 0.700 | |
| Creatinine | 67.44±23.91 | | 0.998(0.993-1.002) | 0.328 | |
| Urea nitrogen | 9.07±2.72 | | 1.000(0.997-1.003) | 0.921 | |
| ANLR | 17.03±14.71 | | 0.983(0.976-0.991) | <0.000 | |
| NLR | 4.71±3.67 | | 1.003(0.992-1.015) | 0.600 | |
| PLR | 174.16±112.93 | | 1.000(0.999-1.001) | 0.339 | |

**Table S5. The association between ANLR and hazard ratio of Progression-free survival in various subgroups.**

| Variables | Internal validation cohort | HR(95%CI) | | P | |
| --- | --- | --- | --- | --- | --- |
| All patients | 225 | | 1.440(1.058-1.959) | | <0.001 | |
| Age（years）  <60  ≥60 | 101(44.89)  124(55.11) | | 0.978(0.959-0.997)  0.983(0.971-0.995) | | 0.026  0.005 | |
| BMI（kg/m2）  ＜18.5  ≥18.5＜24  ≥24 | 50(22.22)  110(48.89)  65(28.89) | | 0.984(0.970-0.999)  0.987(0.972-1.001)  0.941(0.898-0.986) | | 0.030  0.068  0.011 | |
| Hospitalization  <7  ≥7 | 94(41.78)  131(58.22) | | 0.959(0.937-0.981)  0.989(0.978-1.000) | | <0.001  0.052 | |
| Genger  Male  Female | 158（70.2）  67（29.8） | | 0.987(0.975-0.999)  0.969(0.950-0.987) | | 0.029  <0.001 | |
| Smoking  Yes  No | 96（42.7）  129（57.3） | | 0.987(0.972-1.003)  0.977(0.964-0.990) | | 0.121  <0.001 | |
| Alcohol  Yes  No | 39（17.3）  186（82.7） | | 0.991(0.970-1.013)  0.978(0.968-0.990) | | 0.429  <0.001 | |
| Diabetes  Yes  No | 16（7.1）  209（92.9） | | 1.015(0.978-1.054)  0.978(0.968-0.989) | | 0.430  <0.001 | |
| Hypertension  Yes  No | 23（10.2）  202（89.8） | | 0.965(0.928-1.004)  0.981(0.971-0.992) | | 0.078  <0.001 | |
| Cardiovascular  Yes  No | 4（1.8）  221（98.2） | | 0.981(0.971-0.992)  0.980(0.970-0.990) | | <0.001  <0.001 | |
| Chronic hepatitis  Yes  No | 8（3.6）  217（96.4） | | 0.940(0.859-1.028)  0.981(0.971-0.991) | | 0.176  <0.001 | |
| Tuberculosis  Yes  No | 2（0.9）  223（99.1） | | 0.947(0.789-1.137)  0.981(0.971-0.991) | | 0.562  <0.001 | |
| Adjuvant  Yes  No | 150（66.7）  75（33.3） | | 0.984(0.972-0.995)  0.977(0.958-0.995) | | 0.006  0.015 | |
| Differentiation  Undifferentiated  Poor  Medium  High | 9（4.0）  127（56.4）  57（25.3）  32（14.2） | | 1.005(0.946-1.069)  0.978(0.964-0.991)  0.994(0.978-1.010)  0.965(0.937-0.994) | | 0.860  0.001  0.465  0.017 | |
| TNM Stage  Ⅰ  Ⅱ  Ⅲ  Ⅳ | 42（18.7）  22（9.8）  94（41.8）  67（29.7） | | 0.964(0.941-0.988)  0.948(0.909-0.989)  0.990(0.975-1.005)  0.999(0.981-1.016) | | 0.003  0.014  0.193  0.861 | |
| T Stage  T1  T2  T3  T4 | 21（9.3）  26（11.6）  57（25.3）  121（53.8） | | 0.981(0.953-1.008)  0.958(0.922-0.995)  0.975(0.952-0.997)  0.988(0.975-1.001) | | 0.170  0.025  0.028  0.081 | |
| N Stage  N0  N1  N2  N3 | 32（14.2）  44（19.6）  58（25.8）  91（40.4） | | 0.983(0.960-1.007)  0.971(0.947-0.995)  0.979(0.959-1.000)  0.987(0.971-1.003) | | 0.164  0.020  0.053  0.109 | |
| M Stage  M0  M1 | 163（72.4）  62（27.6） | | 0.979(0.967-0.991)  0.989(0.971-1.007) | | <0.001  0.215 | |
| Leukocyte （109/L） | 6.17±3.56 | | 0.996(0.971-1.021) | | 0.726 | |
| Neutrophil （109/L） | 6.00±9.86 | | 1.001(0.994-1.009) | | 0.714 | |
| Platelet （109/L） | 202.14±104.28 | | 1.000(0.999-1.001) | | 0.747 | |
| Lymphocyte（109/L） | 1.97±0.95 | | 0.982(0.964-1.001) | | 0.062 | |
| Hemoglobin （g/L） | 107.87±25.42 | | 0.998(0.993-1.002) | | 0.251 | |
| Albumin （g/dL） | 38.94±24.60 | | 0.977(0.960-0.993) | | 0.007 | |
| Total bilirubin | 16.34±14.40 | | 1.005(1.001-1.010) | | 0.024 | |
| Direct bilirubin | 6.81±1.07 | | 1.008(1.001-1.014) | | 0.020 | |
| AST | 32.93±31.90 | | 1.000(0.997-1.003) | | 0.910 | |
| ALT | 28.85±26.67 | | 0.999(0.996-1.003) | | 0.700 | |
| Creatinine | 69.66±25.84 | | 0.998(0.993-1.002) | | 0.328 | |
| Urea nitrogen | 6.08±4.71 | | 1.000(0.997-1.003) | | 0.921 | |
| ANLR8 | 16.64±7.35 | | 0.462(0.349-0.612) | | <0.000 | |
| NLR | 4.91±6.64 | | 1.003(0.992-1.015) | | 0.600 | |
| PLR | 200.95±160.98 | | 1.000(0.999-1.001) | | 0.339 | |

**Table S6 OS and PFS performance of model in the internal validation cohort**

| **Performance measure** | **OS validation** | **PFS validation** |
| --- | --- | --- |
| **Overall fit** |  |  |
| R2Nagelkerke | 0.287(0.201-0.488) | 0.233(0.178-0.323) |
| Brier score | 0.189(0.100-0.372) | 0.150(0.101-0.226) |
| **Calibration** |  |  |
| Calibration-in-the-large=Emax | 0.015(0.001-0.102) | 0.061(0.002-0.122) |
| Calibration slope | 1.00(0.920-1.080) | 1.000(0.944-1.081) |
| Integrated calibration index=Eavg | 0.053(0.011-0.191) | 0.019(0.002-0.188) |
| **Discrimination** |  |  |
| D statistic | 0.933(0.864-1.003) | 1.121(1.017-1.225) |
| C statistic | 0.659(0.600-0.700) | 0.709(0.544-0.988) |
| Harrell’s C | 0.653 (0.620-0.686) | 0.667(0.629-0.705) |
| Discrimination index | 0.762 | 0.753 |
| D:Chi-sq​​ | 74.99 | 96.07 |

**Table S7 OS performance of model** **in the internal and temporal validation cohort**

| **Performance measure** | **Internal validation** | **Temporal validation** |
| --- | --- | --- |
| **Overall fit** |  |  |
| R2Nagelkerke | 0.087(0.011-0.188) | 0.167(0.101-0.528) |
| Brier score | 0.189(0.102-0.472) | 0.218(0.112-0.582) |
| **Calibration** |  |  |
| Calibration-in-the-large=Emax | 0.015(0.004-0.412) | 0.116(0.013-0.529) |
| Calibration slope | 1.000(0.920-1.080) | 1.000(0.910-1.362) |
| Integrated calibration index=Eavg | 0.053(0.013-0.344) | 0.026(0.100-0.372) |
| **Discrimination** |  |  |
| D statistic | 0.933(0.864-1.003) | 0.849(0.741-0.957) |
| C statistic | 0.659(0.600-0.700) | 0.694(0.301-0.834) |
| Harrell’s C | 0.653 (0.620-0.686) | 0.664(0.608-0.720) |
| Discrimination index | 0.062 | 0.853 |
| D:Chi-sq​​ | 74.99 | 0.129 |

**Table S8 PFS performance of model in the internal and temporal validation cohort**

| **Performance measure** | **Internal validation** | **Temporal validation** |
| --- | --- | --- |
| **Overall fit** |  |  |
| R2Nagelkerke =R2(%) | 0.133(0.051-0.418) | 0.578(0.313-1.184) |
| Brier score | 0.150(0.115-2.158) | 0.099(0.010-0.224) |
| **Calibration** |  |  |
| Calibration-in-the-large=Emax | 0.061(0.016-0.199) | 0.051(0.004-0.127) |
| Calibration slope | 1.000(0.211-1.093) | 1.000(0.251-1.103) |
| Integrated calibration index=Eavg | 0.019(0.007-0.211) | 0.018(0.005-0.192) |
| **Discrimination** |  |  |
| D statistic | 1.121(1.017-1.225) | 2.649(2.102-3.196) |
| C statistic | 0.709(0.441-1.774) | 0.911 (0.311-2.201) |
| Harrell’s C | 0.667(0.629-0.705) | 0.883(0.842-0.924) |
| Discrimination index | 0.054 | 0.729 |
| D:Chi-sq​​ | 96.07 | 0.510 |
